# Supplementary material for: A Virtual Hope Box: Randomized Controlled Trial of a Smartphone App for Emotional Regulation and Coping With Distress
Source: Atypon-hosted journal article supplement (doi:10.1176/appi.ps.201600283), 2016-11-15
Supplement: appi.ps.201600283.ds001.pdf [file appi.ps.201600283.ds001.pdf]

 


Psychiatry Online
